# Supplementary material for: A Bibliometric Analysis of Stroke Caregiver Research from 1989 to 2022
Source: MDPI journal article supplement (doi:10.3390/ijerph20054642), 2023-03-06
Supplement: s1 [file s1]

# Supplementary Materials

## 1. Countries

Supplement Table S1: Number of Publication by Countries and Income Group

| Rank (No. Publication) | Country      | No. of Publication | Total Citation | Average Citation | World Bank Income Group 2019 |
|------------------------|--------------|--------------------|----------------|------------------|------------------------------|
| 1                      | USA          | 193                | 4720           | 24.46            | High Income                  |
| 2                      | China        | 82                 | 1240           | 15.12            | Upper Middle Income          |
| 3                      | Canada       | 41                 | 1455           | 35.49            | High Income                  |
| 4                      | Netherlands  | 33                 | 1183           | 35.85            | High Income                  |
| 5                      | UK           | 29                 | 1472           | 50.76            | High Income                  |
| 6                      | Brazil       | 24                 | 177            | 7.38             | Upper Middle Income          |
| 7                      | Australia    | 23                 | 590            | 25.65            | High Income                  |
| 8                      | Turkey       | 21                 | 131            | 6.24             | Upper Middle Income          |
| 9                      | Korea        | 18                 | 319            | 17.72            | High Income                  |
| = 9                    | Singapore    | 18                 | 220            | 12.22            | High Income                  |
| 11                     | Iran         | 15                 | 112            | 7.47             | Upper Middle Income          |
| = 11                   | Italy        | 15                 | 289            | 19.27            | High Income                  |
| = 11                   | Sweden       | 15                 | 737            | 49.13            | High Income                  |
| 14                     | Germany      | 13                 | 112            | 8.62             | High Income                  |
| = 14                   | India        | 13                 | 160            | 12.31            | Lower Middle Income          |
| 16                     | Spain        | 12                 | 130            | 10.83            | High Income                  |
| 17                     | Nigeria      | 11                 | 153            | 13.91            | Lower Middle Income          |
| 18                     | Malaysia     | 10                 | 15             | 1.5              | Upper Middle Income          |
| 19                     | Portugal     | 9                  | 77             | 8.56             | High Income                  |
| = 19                   | South Africa | 9                  | 28             | 3.11             | Upper Middle Income          |
| 21                     | Japan        | 8                  | 214            | 26.75            | High Income                  |
| 22                     | Thailand     | 7                  | 65             | 9.29             | Upper Middle Income          |
| 23                     | Indonesia    | 6                  | 9              | 1.5              | Lower Middle Income          |
| 24                     | Luxembourg   | 5                  | 91             | 18.2             | High Income                  |
| 25                     | Belgium      | 4                  | 84             | 21               | High Income                  |
| = 25                   | Poland       | 4                  | 132            | 33               | High Income                  |
| 27                     | Greece       | 3                  | 7              | 2.33             | High Income                  |
| = 27                   | Ireland      | 3                  | 46             | 15.33            | High Income                  |
| = 27                   | Israel       | 3                  | 44             | 14.67            | High Income                  |
| = 27                   | Pakistan     | 3                  | 10             | 3.33             | Lower Middle Income          |
| 31                     | France       | 2                  | 11             | 5.5              | High Income                  |
| = 31                   | New Zealand  | 2                  | 40             | 20               | High Income                  |
| = 31                   | Norway       | 2                  | 7              | 3.5              | High Income                  |
| = 31                   | Uganda       | 2                  | 11             | 5.5              | Low Income                   |
| 35                     | Argentina    | 1                  | 1              | 1                | Upper Middle Income          |
| = 35                   | Austria      | 1                  | 0              | 0                | High Income                  |
| = 35                   | Benin        | 1                  | 10             | 10               | Lower Middle Income          |
| = 35                   | Cameroon     | 1                  | 0              | 0                | Lower Middle Income          |
| = 35                   | Congo        | 1                  | 0              | 0                | Lower Middle Income          |
| = 35                   | Denmark      | 1                  | 277            | 277              | High Income                  |
| = 35                   | Finland      | 1                  | 149            | 149              | High Income                  |
| = 35                   | Ghana        | 1                  | 3              | 3                | Lower Middle Income          |
| = 35                   | Iceland      | 1                  | 4              | 4                | High Income                  |
| = 35                   | Jamaica      | 1                  | 6              | 6                | Upper Middle Income          |
| = 35                   | Jordan       | 1                  | 19             | 19               | Upper Middle Income          |

| Rank (No. Publication) | Country      | No. of Publication | Total Citation | Average Citation | World Bank Income Group 2019 |
|------------------------|--------------|--------------------|----------------|------------------|------------------------------|
| = 35                   | Latvia       | 1                  | 0              | 0                | High Income                  |
| = 35                   | Lebanon      | 1                  | 2              | 2                | Upper Middle Income          |
| = 35                   | Saudi Arabia | 1                  | 8              | 8                | High Income                  |
| = 35                   | Switzerland  | 1                  | 3              | 3                | High Income                  |
| = 35                   | Vietnam      | 1                  | 7              | 7                | Lower Middle Income          |
| = 35                   | Zimbabwe     | 1                  | 2              | 2                | Lower Middle Income          |

Income Group Source (2019):

- Source Page: <https://datahelpdesk.worldbank.org/knowledgebase/articles/906519>
- Excel File: <http://databank.worldbank.org/data/download/site-content/OGHIST.xlsx>

## 2. Institution Collaboration

Supplement Table S2: Institution Collaboration Cluster by Colour (figure 7)

|                                                                                                                                                                                                                                                                                                                                                                                                             |                                                                                                                                                                                                                                                                                                          |                                                                                                                                                                                                                                                            |                                                                                                                                                                                                                                                                                                                                                                                              |                                                                                                                                                                                                   |
|-------------------------------------------------------------------------------------------------------------------------------------------------------------------------------------------------------------------------------------------------------------------------------------------------------------------------------------------------------------------------------------------------------------|----------------------------------------------------------------------------------------------------------------------------------------------------------------------------------------------------------------------------------------------------------------------------------------------------------|------------------------------------------------------------------------------------------------------------------------------------------------------------------------------------------------------------------------------------------------------------|----------------------------------------------------------------------------------------------------------------------------------------------------------------------------------------------------------------------------------------------------------------------------------------------------------------------------------------------------------------------------------------------|---------------------------------------------------------------------------------------------------------------------------------------------------------------------------------------------------|
| <b>cluster 1 (colour: red)</b><br>univ calgary<br>univ toronto<br>mcmaster univ<br>univ washington<br>michigan state univ<br>univ delaware<br>indiana univ<br>indiana univ purdue univ<br>univ cincinnati<br>no arizona univ<br>univ n carolina<br>boston coll<br>univ roma tor vergata<br>univ florida<br>schmitzberger<br>geriatric res educ and clin<br>ctr<br>univ miami<br>res serv<br>penn state univ | <b>cluster 2 (colour: dark blue)</b><br>baylor coll med<br>univ texas hlth sci ctr<br>houston<br>texas woman univ<br>emory univ<br>univ alabama<br>univ alabama birmingham<br>univ s florida<br>johns hopkins univ                                                                                       | <b>cluster 4 (colour: purple)</b><br>duke univ<br>china med univ<br>univ oxford<br>duke kunshan univ<br>ningxia med univ<br>peking univ<br>chongqing med univ<br>george inst global hlth<br>univ sydney<br>singapor inst technol<br>chinese univ hong kong | <b>cluster 6 (colour: green)</b><br>singapore gen hosp<br>changi gen hosp<br>natl neurosci inst<br>natl univ singapore hosp<br>raffles neurosci c tr<br>khoo teck puat hosp<br>durham va med ctr<br>st andrews community<br>hosp<br>tan tock seng hosp<br>natl univ hosp<br>duke nus grad med school<br>st lukes hosp<br>mt alvernia hosp<br>policy res and econ off<br>lawson htll res inst | <b>cluster 8 (colour: pink)</b><br>lund univ<br>karolinska inst<br>uppsala univ<br>clin res ctr<br>univ sains malaysia<br>king coll london<br>univ leeds<br>acad unit elderly care and<br>rehabil |
|                                                                                                                                                                                                                                                                                                                                                                                                             | <b>cluster 3 (colour: orange)</b><br>univ illinois<br>rehabil inst chicago<br>northwestern univ<br>yonsei univ<br>vrije univ amsterdam<br>inst rehabil res<br>maastricht univ<br>univ groningen<br>univ med ctr utrecht<br>leiden univ<br>univ appl sci<br>charite univ med berlin<br>univ hosp wurzburg | <b>cluster 5 (colour: light blue)</b><br>gleaneagles hosp<br>nanyang technol univ<br>durham vet adm med ctr<br>chou neurosci clin<br>off healthcare transformat<br>technol and data grp                                                                    | <b>cluster 7 (colour: grey)</b><br>chang gung univ<br>sch nursing<br>asia univ                                                                                                                                                                                                                                                                                                               | <b>cluster 9 (colour: light brown)</b><br>vrije univ brussel<br>univ antwerp<br>univ melbourne<br>monash univ                                                                                     |
|                                                                                                                                                                                                                                                                                                                                                                                                             |                                                                                                                                                                                                                                                                                                          | <b>cluster 11 (colour: light green)</b><br>tianjin med univ<br>sichuan univ                                                                                                                                                                                |                                                                                                                                                                                                                                                                                                                                                                                              | <b>cluster 10 (colour: dark brown)</b><br>hong kong polytech univ<br>zhenzou univ                                                                                                                 |
|                                                                                                                                                                                                                                                                                                                                                                                                             |                                                                                                                                                                                                                                                                                                          |                                                                                                                                                                                                                                                            |                                                                                                                                                                                                                                                                                                                                                                                              |                                                                                                                                                                                                   |

### 3. R script

We believe in research reproducibility, and to honour that belief, R script used in this manuscript is shared here. Reader may run this script to validate our findings.

Data available from <https://zenodo.org/record/7421945>

```
## Library
require(tidyverse)
require(bibliometrix)

## Data Import and Convert-----
## File link from zenodo site
linkfile_1 <- "https://zenodo.org/record/7421945/files/22-12-07%20WOS_TIstcgp1.bib?download=1"
linkfile_2 <- "https://zenodo.org/record/7421945/files/22-12-07%20WOS_TIstcgp2.bib?download=1"
## Import and Combine
bibds1_wos <- convert2df(file = linkfile_1, dbsource = "wos", format = "bibtex")
bibds2_wos <- convert2df(file = linkfile_2, dbsource = "wos", format = "bibtex")
bibds_wos <- bind_rows(bibds1_wos, bibds2_wos)
## Convert to 'bibliometrix' class object
bibres <- biblioAnalysis(bibds_wos)

## General Information -----
## Summary
bibres_summary <- summary(bibres)
## Summary Plot
bibres_plot <- plot(bibres, k = 10)
## Figure 1
bibres_plot$AnnualScientProd

## Influential Articles -----
## Table 1
tibble(Title = bibds_wos$TI, Author = bibds_wos$AU, Year = bibds_wos$PY,
       DOI = bibds_wos$DI, Citations = bibds_wos$TC,
       CitaPerYear = Citations/(2023-Year)) %>%
  mutate(across(.cols = c(Title, Author), .fns = str_to_title),
         CitaPerYear = round(CitaPerYear, 2)) %>%
  arrange(desc(Citations)) %>% head(n=10)
## Table 2
tibble(Title = bibds_wos$TI, Author = bibds_wos$AU, Year = bibds_wos$PY,
       DOI = bibds_wos$DI, Citations = bibds_wos$TC,
       CitaPerYear = Citations/(2023-Year)) %>%
  mutate(across(.cols = c(Title, Author), .fns = str_to_title),
         CitaPerYear = round(CitaPerYear, 2)) %>%
  arrange(desc(CitaPerYear)) %>% head(n=10)

## Language -----
## Table 3
bibds_wos %>%
  group_by(LA) %>% summarise(n = n()) %>%
```

```

mutate(percent = n / sum(n) * 100, percent = round(percent,1)) %>%
arrange(desc(n))

## Authors -----
## Figure 2
bibds_noaufreq <- bibds_wos %>%
  select(TI, AU, DT) %>% tibble() %>%
  mutate(no_auth = str_count(AU, pattern = ";") + 1,
         DT = fct_recode(DT,
                        "ARTICLE" = "PROCEEDINGS PAPER",
                        "ARTICLE" = "ARTICLE; PROCEEDINGS PAPER",
                        "ARTICLE" = "ARTICLE; EARLY ACCESS",
                        "REVIEW" = "REVIEW; EARLY ACCESS")) %>%
  rename("paper" = "TI", "author" = "AU", "type" = "DT") %>%
  group_by(no_auth, type) %>%
  summarise(freq = n(), .groups = "drop") %>%
  mutate(percent = freq / sum(freq) * 100, percent = round(percent,1))
bibds_noaufreq %>%
  mutate(type = str_to_title(type)) %>%
  ggplot(aes(no_auth, freq, fill = type)) +
  geom_bar(stat = "identity") +
  labs(x = "Number of Authors", y = "Frequency (Number of Articles)",
       fill = "Type") +
  scale_x_continuous(breaks = seq(0,30,4)) +
  scale_y_continuous(breaks = seq(0,200,20)) +
  theme_bw() + theme(legend.position = "top")

## Table 4
bibres_aulist <- bibres$Authors
bibres_autable <- tibble(Rank = seq_along(bibres_aulist),
                        Author = rownames(bibres_aulist),
                        Np = as.integer(bibres_aulist)) %>%
  mutate(Author = fct_reorder(Author, Rank))
bibres_autable %>%
  rename("Number of Publications" = "Np") %>%
  mutate(Author = stringr::str_to_title(Author),
         percent = `Number of Publications` / bibres$Articles * 100,
         percent = round(percent,1)) %>% head(n = 15)

## Figure 3
bib_AuCoupling_NetMatrix <- biblioNetwork(bibds_wos, analysis = "coupling",
                                           network = "authors", sep = ";")
bib_AuCoupling_Plot <- networkPlot(bib_AuCoupling_NetMatrix, n = 25,
                                   cluster = "optimal", type = "auto",
                                   size.cex = T, size = 20, remove.multiple = F,
                                   Title = "Bibliographic coupling of the authors",
                                   alpha = .7)

```

```

## Keywords -----
## Table 5
cbind(Rank = 1:10, bibres_summary$MostRelKeywords)
## Figure 4
bib_kwco_NetMatrix <- biblioNetwork(bibds_wos, analysis = "co-occurrences",
                                   network = "keywords", sep = ";")
bib_kwco_Plot <- networkPlot(bib_kwco_NetMatrix, normalize = "association",
                             n = 25, Title = "Keyword Co-occurrences",
                             cluster = "optimal", type = "fruchterman",
                             size.cex = T, size = 15, remove.multiple = F,
                             edgesize = 7, labelsize = 1.2, label.cex = F,
                             label.n = 20, edges.min = 10)

## Journals -----
## Table 6
bib_bradford <- bradford(bibds_wos)
bib_bradfordtable <- bib_bradford$table %>%
  select(Zone, Freq, Rank) %>% tibble() %>% group_by(Zone) %>%
  summarise(nSO = n(), nArt = sum(Freq),
            RankRange = str_c(min(Rank), max(Rank), sep = "-")) %>%
  mutate(percent = nArt / sum(nArt) * 100, percent = round(percent,1))
bib_bradford$table %>%
  filter(Zone == "Zone 1") %>% tibble() %>%
  mutate(SO = stringr::str_to_title(SO)) %>%
  rename("Journal Name" = "SO") %>% relocate(Rank)
## Figure 5
bib_CRSO <- metaTagExtraction(bibds_wos, Field = "CR_SO", sep = ";")
bib_CRSO_NetMatrix <- biblioNetwork(bib_CRSO, analysis = "co-citation",
                                   network = "sources", sep = ";")
bib_CRSO_Plot <- networkPlot(bib_CRSO_NetMatrix, n = 25,
                             Title = "Co-citation Network", type = "auto",
                             size.cex = T, size = 20, remove.multiple = F,
                             labelsize = 1, edgesize = 5, edges.min = 1, alpha = .7)

## Institutions -----
## Table 7
bibres_instlist <- bibres$Affiliations
bibres_insttable <- tibble(Rank = seq_along(bibres_instlist),
                           InstitutionAffiliation = rownames(bibres_instlist),
                           Np = as.integer(bibres_instlist)) %>%
  mutate(InstitutionAffiliation = fct_reorder(InstitutionAffiliation, Rank))
bibres_insttable %>%
  rename("Number of Publications" = "Np",
        "Institution Name" = "InstitutionAffiliation") %>%
  mutate(`Institution Name` = stringr::str_to_title(`Institution Name`)) %>%
  head(n = 10)

```

```

## Figure 6
bib_educonlab_NetMatrix <- biblioNetwork(bibds_wos, analysis = "collaboration",
                                         network = "universities", sep = ";")
bib_educonlab_Plot <- networkPlot(bib_educonlab_NetMatrix, n = 100,
                                  cluster = "optimal", type = "auto",
                                  size.cex = F, size = 5, remove.multiple = F,
                                  labelsizel=1, alpha = 1, edgesize = 2,
                                  edges.min = 1, remove.isolates = T,
                                  community.repulsion = 0, label = F,
                                  Title = "Institutions collaboration")

## Country -----
## Table 8a
bibres_countrylist <- bibres$Countries
bibres_countrytable <- tibble(Rank = seq_along(bibres_countrylist),
                              Country = rownames(bibres_countrylist),
                              Np = as.integer(bibres_countrylist)) %>%
  mutate(Country = fct_reorder(Country, Rank),
         percent = Np / sum(Np) * 100, percent = round(percent,1))

## Table 8b
bibressum_countrytable <- tibble(Rank = 1:10,
                                 bibres_summary$TCperCountries) %>%
  rename("Country" = "Country      ") %>%
  mutate(Country = str_trim(Country),
         Country = fct_reorder(Country, Rank),
         `Total Citations` = as.integer(`Total Citations`),
         `Average Article Citations` = as.double(`Average Article Citations`),
         percent = `Total Citations` / sum(`Total Citations`) * 100,
         percent = round(percent,1)) %>%
  inner_join(x = ., y = select(bibres_countrytable, Country, Np), by = "Country") %>%
  relocate(percent, .after = `Total Citations`)

## Figure 7
bib_concolab <- metaTagExtraction(bibds_wos, Field = "AU_CO", sep = ";")
bib_concolab_NetMatrix <- biblioNetwork(bib_concolab, analysis = "collaboration",
                                         network = "countries", sep = ";")
bib_concolab_Plot <- networkPlot(bib_concolab_NetMatrix,
                                 n = dim(bib_concolab_NetMatrix)[1],
                                 type = "auto", Title = "Country Collaboration",
                                 size=10, size.cex=T, edgesize = 2, labelsizel=1.1,
                                 edges.min = 2, remove.isolates = T,
                                 community.repulsion = 0, cluster = "none")

```
